# Supplementary material
Source: publisher figshare collection journal article supplement (https://gsajournals.figshare.com/articles/dataset/_/14884977)
Supplement: Supplementary file 1 [file 1]

1                   Supplementary Materials for:

2  
3   Transposable element profiles reveal cell line identity  
4   and loss of heterozygosity in *Drosophila* cell culture.

5       Shunhua Han<sup>\*</sup>, Preston J. Basting<sup>\*</sup>, Guilherme B. Dias<sup>\*,†</sup>, Arthur Luhur<sup>‡,§</sup>,  
6                   Andrew C. Zelhof<sup>‡,§</sup>, and Casey M. Bergman<sup>\*,†</sup>

7   <sup>\*</sup>Institute of Bioinformatics, University of Georgia, Athens, GA, USA, 30602

8   <sup>†</sup>Department of Genetics, University of Georgia, Athens, GA, USA, 30602

9   <sup>‡</sup>*Drosophila* Genomics Resource Center, Indiana University, Bloomington,  
10                   Indiana 47405

11   <sup>§</sup>Department of Biology, Indiana University, Bloomington, Indiana 47405

12   **Address for correspondence:**

13   Casey M. Bergman

14   Department of Genetics and Institute of Bioinformatics

15   University of Georgia

16   Davison Life Sciences Building

17   120 E. Green St.

18   Athens, GA 30601

19   cbergman@uga.edu

# 1 Supplementary Text

## 1.1 Description of the ngs\_te\_mapper2 method for detecting non-reference TE insertions in single-end whole genome shotgun data

ngs\_te\_mapper2 ([https://github.com/bergmanlab/ngs\\_te\\_mapper2](https://github.com/bergmanlab/ngs_te_mapper2)) is a re-implementation of the method for detecting non-reference TE insertions in single-end whole genome shotgun sequence data initially reported in Linheiro and Bergman (2012). ngs\_te\_mapper2 uses a three-stage procedure to annotate non-reference TEs as the span of target site duplication (TSD) (Fig. S9), following the annotation framework described in Bergman (2012). In the first stage, whole genome shotgun (WGS) reads are mapped to a library of TE sequences to identify ‘junction reads’ that span the start/end of TE and genomic flanking sequences are retained. Such reads are often referred as ‘split reads,’ although in reality these reads are not split in the resequenced genome.

In the second stage, junction reads from each side of TE insertion identified in the first stage are separately mapped to a reference genome that has been hard-masked with RepeatMasker (<http://www.repeatmasker.org/>) using the same TE library from stage one (Fig. S9). Genome-wide coverage profiles are computed using samtools v1.9 (Li *et al.*, 2009) and genomic intervals with enriched coverage from junction read clusters on the 5’ and 3’ side of TEs are annotated in bed format. Regions of overlap between intervals of junction read clusters from the 5’ and 3’ side of TEs in the resequenced genome define the locations of TSDs for predicted non-reference TE insertions. The strand of non-reference TE predictions is determined from the relative orientation of alignments of the junction reads to the reference genome and TE library.

In the third stage, all reads from the original whole genome shotgun sequence data are mapped against the same hard-masked reference genome as in stage two (Fig. S9). This additional mapping step is necessary to obtain all reads that span the TE-flank junctions, as well as identify if any reads are present for the alternative “reference” haplotype that does not carry the non-reference TE insertion. For each candidate non-reference TE insertion site, the number of junction reads covering 5’ and 3’ side of each candidate TE insertion are estimated as the number of soft-clipped reads overlapping a 10bp window on the 5’ and 3’ side of the TSD, respectively ( $\text{Count}_{\text{junction}5'}$  and  $\text{Count}_{\text{junction}3'}$ ). The number of non-reference reads ( $\text{Count}_{\text{non-ref}}$ ) is estimated as  $\max(\text{Count}_{\text{junction}5'}, \text{Count}_{\text{junction}3'})$ . The number of reference reads ( $\text{Count}_{\text{ref}}$ ) is estimated as number of non-soft-clipped reads spanning the TSD with at least 3bp extension on

51 both sides of the TSD. The allele frequency for non-reference TEs is heuristically estimated as  
52  $\text{Count}_{non-ref}/(\text{Count}_{non-ref} + \text{Count}_{ref})$ .

## 53 **1.2 Evaluation of ngs\_te\_mapper2 performance**

54 To evaluate the prediction performance of ngs\_te\_mapper2 and ngs\_te\_mapper under ideal con-  
55 ditions (one homozygous non-reference TE insertion with a known location), we created arti-  
56 ficial ISO1 (dm6) genomes that each contain a single synthetic transposon insertion from one  
57 of the 125 TE families (excluding *INE-1*) in the Berkeley *Drosophila* Genome Project canon-  
58 ical TE dataset v10.1 ([https://github.com/bergmanlab/transposons/blob/master/releases/D\\_mel\\_](https://github.com/bergmanlab/transposons/blob/master/releases/D_mel_transposon_sequence_set_v10.1.fa)  
59 [transposon\\_sequence\\_set\\_v10.1.fa](https://github.com/bergmanlab/transposons/blob/master/releases/D_mel_transposon_sequence_set_v10.1.fa); revision f94d53ea10b95c9da99258ac2336ce18871768e9). In-  
60 sertion sites were selected at random in regions of normal recombination that were more than  
61 500 bp from a reference TE in the *D. melanogaster* release 6.38 genome annotation ([http://ftp.flybase.net/releases/FB2021\\_01/dmel\\_r6.38/gff/dmel-all-r6.38.gff.gz](http://ftp.flybase.net/releases/FB2021_01/dmel_r6.38/gff/dmel-all-r6.38.gff.gz)). After selecting an  
62 insertions site, a 5bp target site duplication was created and the full length canonical TE se-  
63 quences was inserted into an otherwise unmodified dm6 genome sequence.

65 Ten synthetic genomes were created for each family in the *D. melanogaster* TE set, exclud-  
66 ing the inactive *INE-1* family, leading to total of 1250 synthetic genomes, each with a single  
67 non-reference TE insertion. 625 synthetic genomes contained a non-reference TE insertion  
68 of the TE canonical sequence (positive strand insertions), and 625 contained a non-reference  
69 TE insertion of the reverse complement of the TE canonical sequence (negative strand inser-  
70 tions). For each synthetic genome, 100 bp paired-end reads were simulated at 14X, 25X,  
71 50X, and 100X coverage using wgsim v0.3.1-r13 ((Li, 2015), -e 0.01 -d 500). The forward  
72 reads of each simulated read pair, the unmodified dm6 reference genome, and the Berke-  
73 ley *Drosophila* Genome Project canonical TE dataset v10.1 were used as input for ngs\_te\_-  
74 mapper and ngs\_te\_mapper2 to detect non-reference TE insertions using McClintock (revision  
75 40863acf11052b18afb4cdcd7b1124de48cba397; options: -m ngs\_te\_mapper, ngs\_te\_mapper2).  
76 Non-reference insertion predictions from ngs\_te\_mapper and ngs\_te\_mapper2 were considered  
77 a true positive if they occurred within 5bp of the actual synthetic insertion location and have the  
78 same TE family. Benchmark results under the single homozygous insertion scenario are sum-  
79 marized in Table S4. Under ideal conditions, the recall for ngs\_te\_mapper2 is high ( $\geq 91.7\%$ )  
80 and far exceeds that of ngs\_te\_mapper for all coverage levels. Likewise, in this idealized simu-  
81 lation setting the precision for ngs\_te\_mapper2 is  $\geq 97.0\%$  and the same as or better than ngs\_-  
82 te\_mapper at all coverage levels.

Simulation of single homozygous insertion in unique regions of the dm6 reference genome provides a benchmark of ngs\_te\_mapper2 under ideal conditions, but does not incorporate the reality that TEs can insert into more complex regions of the genome, can exist in heterozygous state and are multiple TEs are predicted simultaneously in real samples. To model both homozygous and heterozygous non-reference TE insertions and evaluate ngs\_te\_mapper2 under a more realistic setting, we created synthetic datasets using reads simulated from the ISO1 (dm6) and A4 (GCA\_003401745.1) (Chakraborty *et al.*, 2018) genome assemblies. In theory, a good predictor should be able to accurately predict “non-reference” insertions that are present in genome 1 (e.g. ISO1) but absent from genome 2 (e.g. A4) using reads simulated from genome 1 mapped to genome 2. We therefore simulated 100bp synthetic paired-end sequencing data from the ISO1 genome assembly under 14X, 25X, 50X, 100X coverages using wgsim v0.3.1-r13 ((Li, 2015), -e 0.01 -d 500) to model homozygous insertions. Additionally, we simulated synthetic paired-end sequencing data by combining equal numbers of reads from both ISO1 and A4 genome assemblies to model heterozygous insertions. The synthetic datasets were used as input to ngs\_te\_mapper2 to detect non-reference TE insertions using McClintock (revision 40863acf11052b18afb4cdcd7b1124de48cba397; options: -m “trimgalore, ngs\_te\_mapper2, map\_reads”). The A4 assembly was used as the reference genome and the Berkeley *Drosophila* Genome Project canonical TE dataset v10.1 were used for these analyses.

As ground truth for evaluating ngs\_te\_mapper2 performance, curated TE annotations from the release 6.38 version of *D. melanogaster* genome ([http://ftp.flybase.net/releases/FB2021\\_01/dmel-r6.38/gff/dmel-all-r6.38.gff.gz](http://ftp.flybase.net/releases/FB2021_01/dmel-r6.38/gff/dmel-all-r6.38.gff.gz)) were lifted over to A4 genome assembly. After excluding *INE-1* insertions and TE insertions in low recombination regions, 627 curated TEs in ISO1 could be lifted over to A4 on the basis of their flanking regions. ngs\_te\_mapper2 predictions were considered true positives if the predicted TE insertion coordinates were within a 5bp window of a lifted over ISO1 TE annotation and if the predicted TE family was the same as the lifted over annotation. The final benchmark results for ngs\_te\_mapper2 applied to simulated real genomes are summarized in Table S5. Similar to single synthetic insertion simulations above, ngs\_te\_mapper2 has high precision ( $\geq 95.0\%$ ) at all coverage levels in simulations designed to model genome-wide TE prediction. In contrast, recall for ngs\_te\_mapper2 under a more realistic setting was much lower than in single synthetic insertion simulations, especially at low coverage levels, and was lower for heterozygous insertions than homozygous insertions at all coverage levels. These results indicate that the TE insertion predictions ngs\_te\_mapper2 makes are accurate but that the method has an appreciable false negative rate on low coverage samples.



### 1.3 Evaluation of a classifier for predicting homozygous or heterozygous TE insertion in single-end WGS data

To fill a gap in tools available to analyze intra-sample TE allele frequencies in single-end WGS data, we developed a classifier to determine whether a TE insertion predicted by `ngs_te_mapper2` is homozygous or heterozygous. Our model classifies a TE insertion as homozygous if the intra-sample allele frequency is  $\geq 0.95$ , as heterozygous if the allele frequency is between 0.25 and 0.75, and is considered unclassified if neither of these conditions are met. To evaluate this approach we used `ngs_te_mapper2` predictions made from the simulated paired-end sequencing data generated from ISO1 and A4 genome assemblies described in the previous section. We evaluated the classifier as follows: if the simulated reads were generated from ISO1 only, then all all non-reference TE insertions were expected to be homozygous and the precision was calculated as  $\text{Count}_{\text{homozygous}} / \text{Count}_{\text{all}}$ . If the simulated data were a combination of reads from both ISO1 and A4, then all non-reference TE insertions were expected to be heterozygous and the precision is  $\text{Count}_{\text{heterozygous}} / \text{Count}_{\text{all}}$ . The final benchmark results were summarized in Table S6. Our classifier had  $\geq 91.3\%$  precision at all coverage levels and never falsely classified a heterozygous TE insertions as homozygous, and is thus conservative for the purposes of detecting loss of heterozygosity.

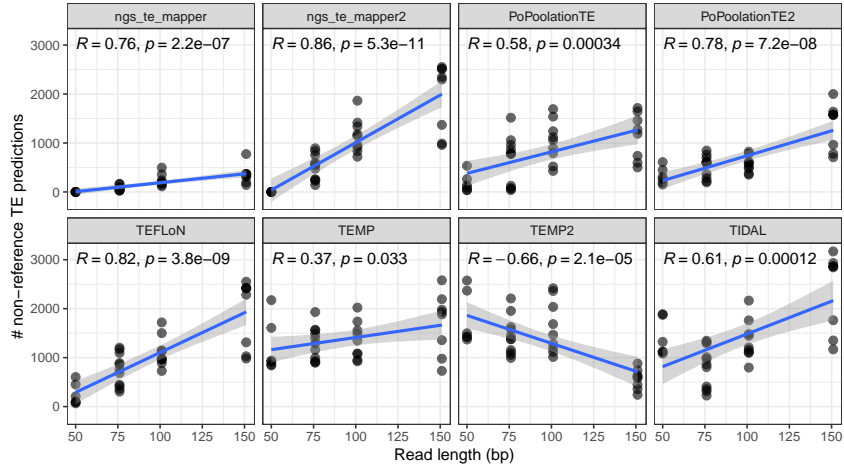

**Figure S1. Relationship between read length and number of non-reference TE predictions for the expanded dataset of 34 *Drosophila* cell line samples.** Each panel represents predictions from one of the eight component methods designed for detection of TE insertions in *Drosophila* that is included in McClintock. The X-axis represents read length in base pairs (bp) and the Y-axis represents the number of non-reference TE predictions. The best fit line and 95% CI were included using linear method. Pearson correlation coefficient with p-values are shown on the top of each panel.

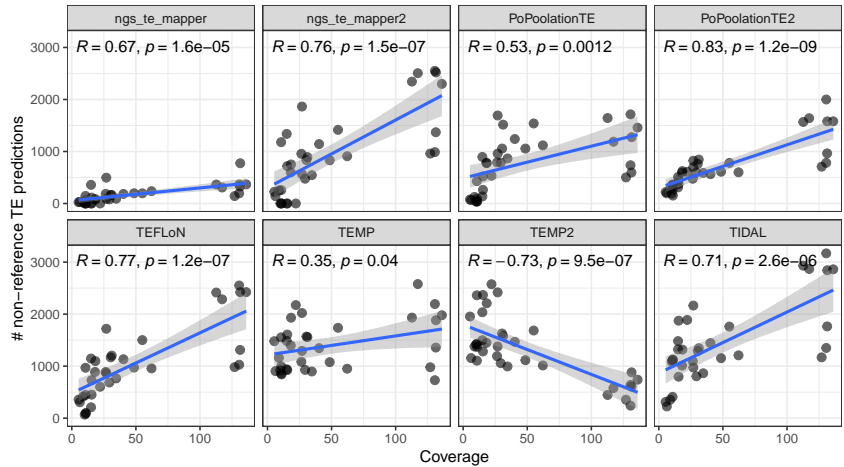

**Figure S2. Relationship between average genome coverage and number of non-reference TE predictions for the expanded dataset of 34 *Drosophila* cell line samples.** Each panel represents predictions from one of the eight component methods designed for detection of TE insertions in *Drosophila* that is included in McClintock. The X-axis represents the average genome coverage computed by McClintock and the Y-axis represents the number of non-reference TE predictions. The best fit line and 95% CI were included using linear method. Pearson correlation coefficient with p-values are shown on the top of each panel.

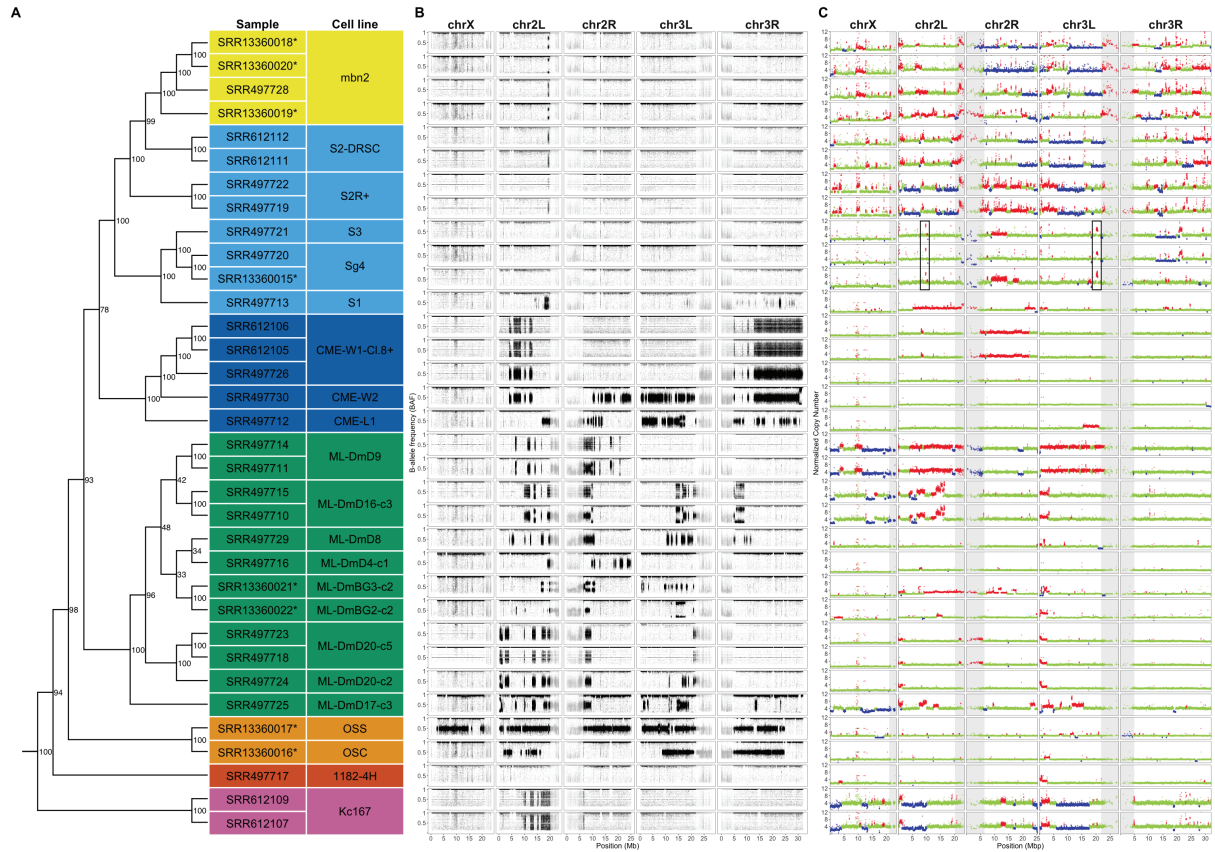

**Figure S3. Copy number and B-allele frequency profiles for the expanded dataset of 34 *Drosophila* cell line samples** (A) Dollo parsimony tree of 34 *Drosophila* cell lines samples (including replicates and sub-lines) based on non-reference TE predictions. Node labels indicate support for each clade based on 100 bootstrap replicates. New sequence data from this study are indicated by asterisks. (B) B-allele frequency profiles for *Drosophila* cell lines on major chromosome arms. For a given SNP, the B-allele frequency (BAF) was determined as the coverage of reads supporting non-reference allele divided by total coverage at that position. SNPs in low recombination regions are plotted in grey. (C) Copy number profiles for *Drosophila* cell lines on major chromosome arms. Each data point represents normalized copy number (ratio\*ploidy) for a given 10kb window estimated by Control-FREEC (Boeva *et al.*, 2012). Data points for each window are colorized by CNV status (red: CNV gain; green: no CNV; blue: CNV loss), which are based on the comparison between normalized copy number for that window and baseline ploidy for the chromosome arm. Black boxes in panel C highlight regions where Sg4 and S3 cell lines share the same copy number gains that are not shared in other cell samples. Low recombination regions are shaded in grey.

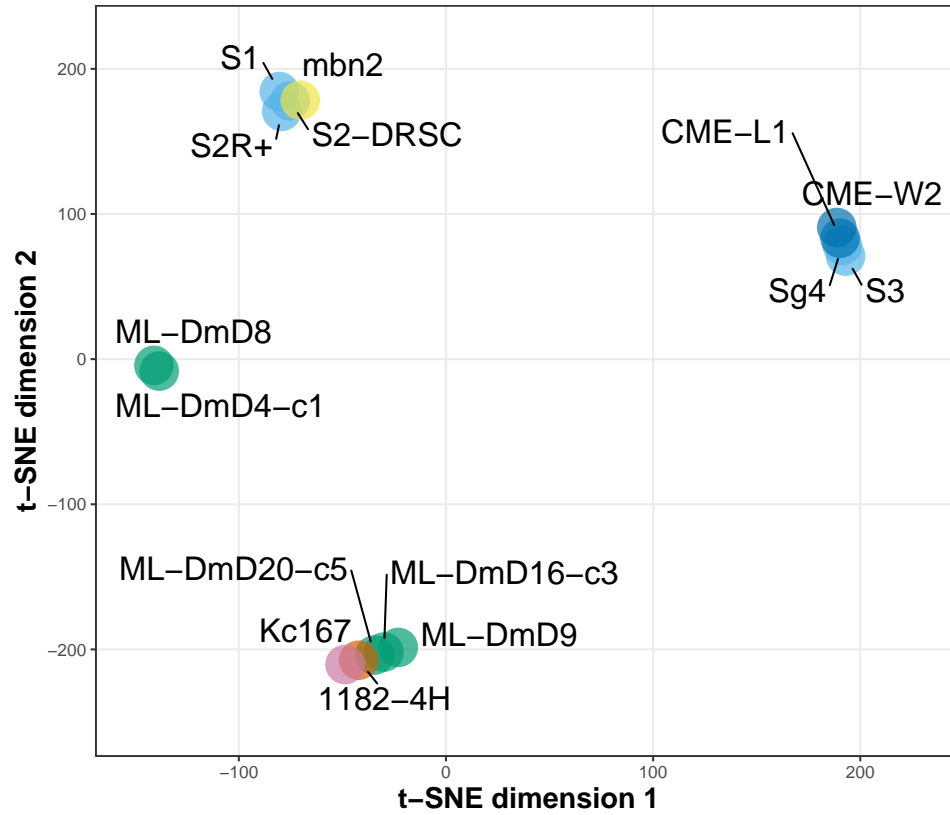

**Figure S4. t-SNE visualization of 15 *Drosophila* cell lines using total RNA-seq data from Brown *et al.* (2014).** t-SNE visualization was produced with perplexity=1. Samples are colorized by the lab origin of cell lines.

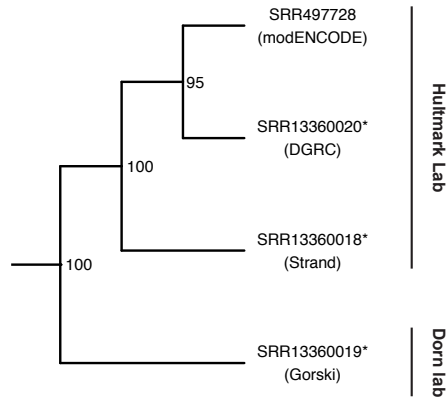

**Figure S5. Clustering of normalized mbn2 cell line genome samples from the modENCODE project plus this study.** Clustering was performed on TE insertions generated using mbn2 samples that were normalized by trimming read lengths to 76bp and downsampling to 19x depth. For this analysis, we also relaxed TEMP filtering to include more weakly-supported predictions at otherwise high-quality loci because of the lower overall coverage in all samples. Numbers beside nodes indicate percent support based on 100 bootstrap replicates. Tip labels include SRA run identifiers and source lab for samples (in parentheses). New sequence data from this study are indicated by asterisks. Clade annotations indicate the donor lab from which the source lab obtained their sub-line of mbn2 cells.

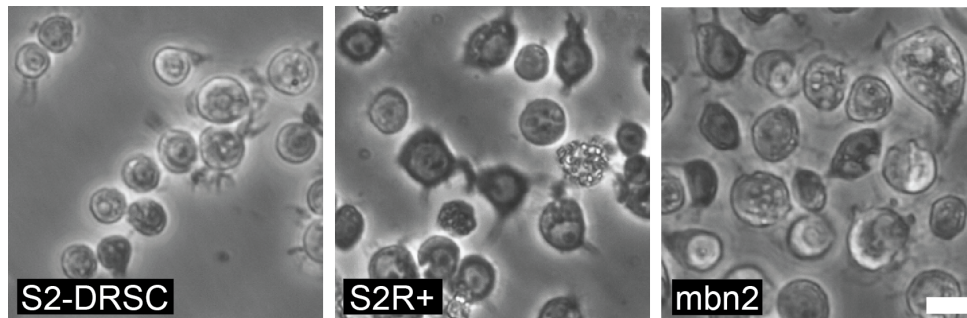

**Figure S6. Morphology of S2, S2R+ and mbn2 cell lines** Phase-contrast micrographs of S2-DRSC (DGRC-181), S2R+ (DGRC-150), and mbn2 (DGRC-147). Scale bar is 10 microns.



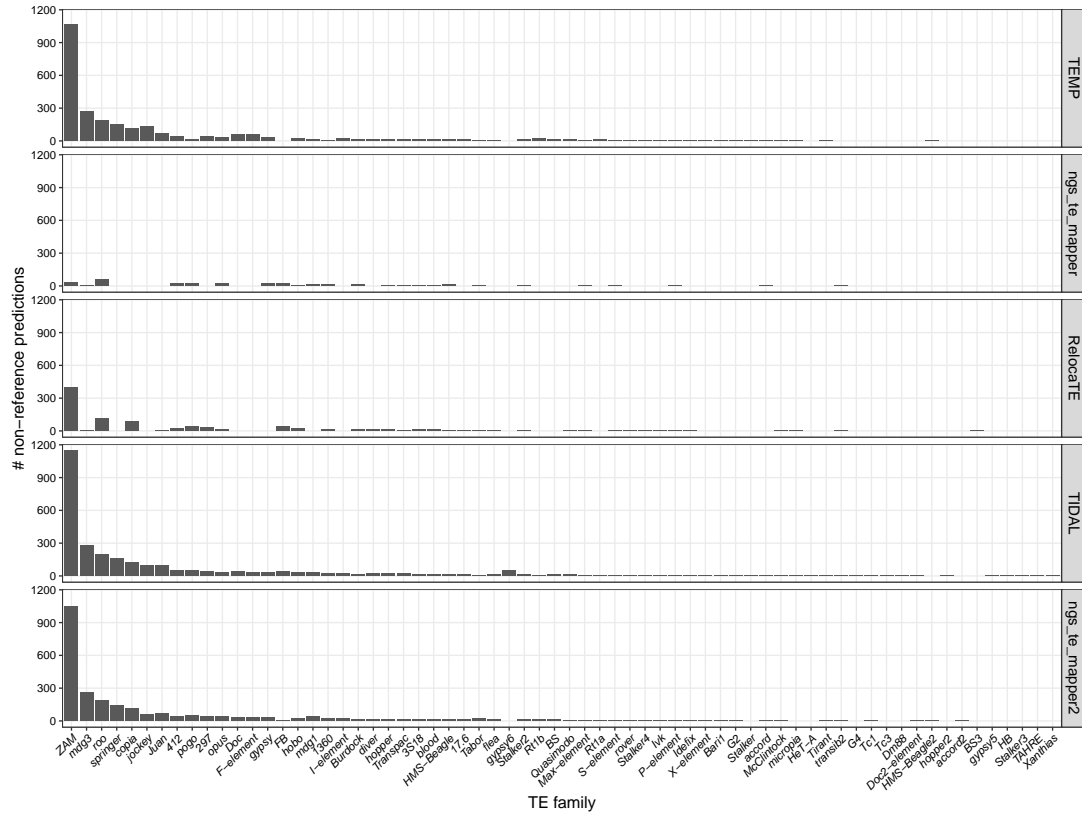

**Figure S8. Number of non-reference TE predictions on OSS\_DGRC using five TE detection methods.** Paired-end sequencing data for OSS\_DGRC was used as input for TEMP, ngs\_te\_mapper, RelocateTE, TIDAL and ngs\_te\_mapper2 to detect non-reference TE insertions using McClintock. *INE-1* and insertion predictions in low recombination regions were excluded from all panels.

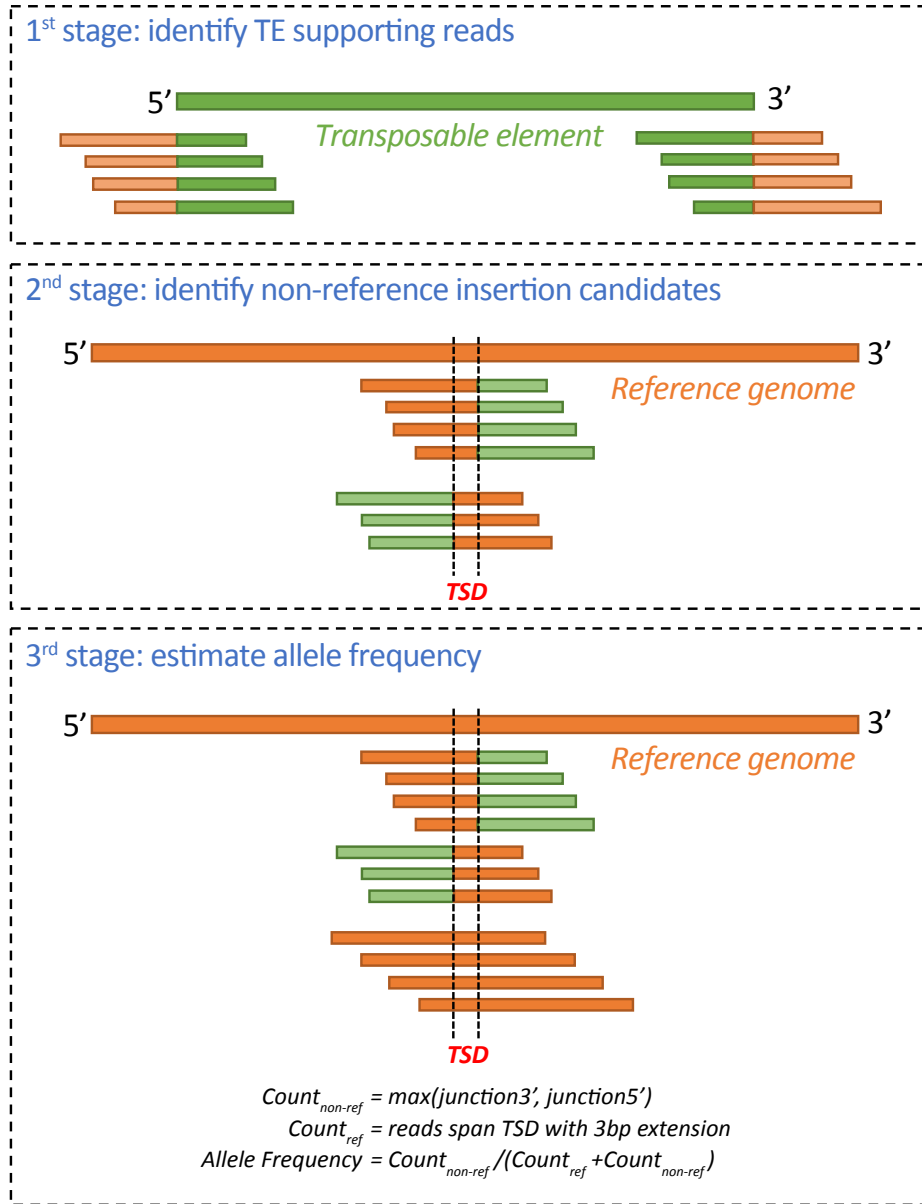

**Figure S9. ngs.te\_mapper2 workflow for predicting non-reference TE insertions.** In the first stage, raw reads are mapped to the TE consensus sequences. Reads that partially map to TEs are extracted as putative TE supporting reads. In the second stage, putative TE supporting reads are mapped to reference genome that has been hard-masked with RepeatMasker using input TE library. Non-reference TE insertion candidates are identified if alignments of TE supporting reads on 5' and 3' end of TE overlap. In the third stage, raw reads are mapped to unmodified reference genome for estimating intra-sample insertion allele frequency. See details in section 1.1.



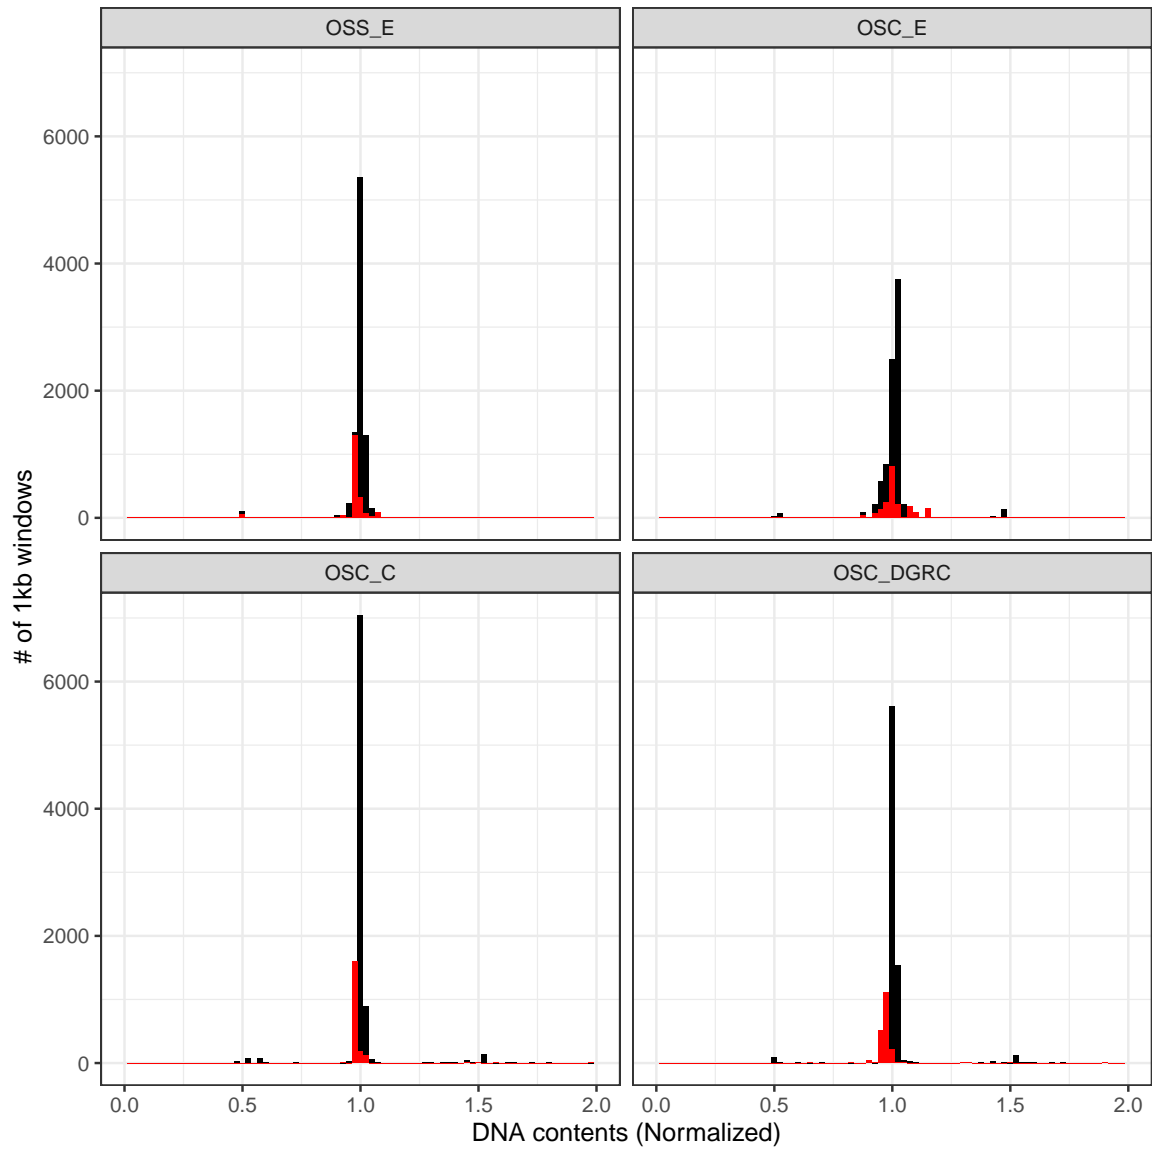

**Figure S10. Normalized DNA content for OSS\_E and OSC cell lines.** Histograms of normalized DNA read density of 1kb windows using the method described in Lee *et al.* (2014). Reads mapping to chromosome X are shown in red. Reads mapping to autosomes are shown in black. Peaks at 0.5, 1.0 and 1.5 are consistent with a diploid base copy number for the OSS\_E/OSC lineage.

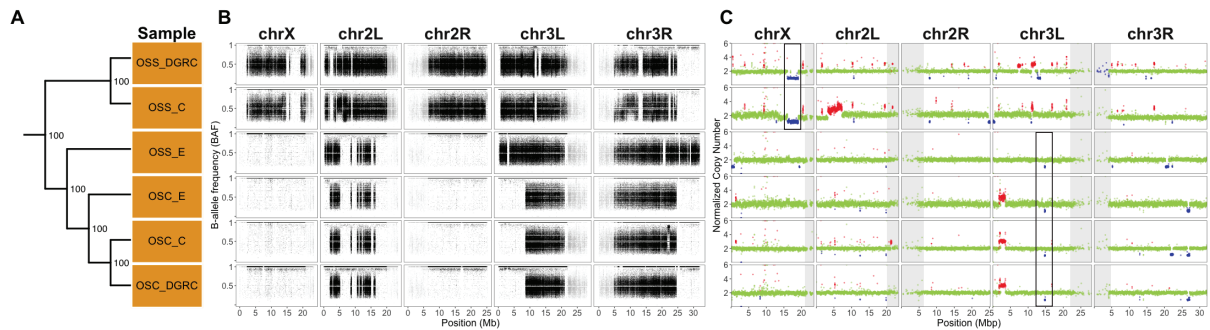

**Figure S11. Copy number and B-allele frequency profiles for six ovarian cell line samples**  
 (A) Dollo parsimony tree of six ovarian cell line samples based on non-reference TE predictions excluding ZAM insertions using single-end WGS data. Node labels indicate support for each clade based on 100 bootstrap replicates. (B) B-allele frequency profiles for ovarian cell line samples on major chromosome arms. For a given SNP, the B-allele frequency (BAF) was determined as the coverage of reads supporting non-reference allele divided by total coverage at that position. SNPs in low recombination regions are plotted in grey. (C) Copy number profiles for ovarian cell line samples on major chromosome arms. Each data point represents normalized copy number (ratio\*ploidy) for a given 10kb window estimated by Control-FREEC (Boeva *et al.*, 2012). Data points for each window are colorized by CNV status (red: CNV gain; green: no CNV; blue: CNV loss), which are based on the comparison between normalized copy number for that window and baseline ploidy for the chromosome arm. Black boxes in panel C highlight regions where cell lines share the same copy number loss events that are not shared in other cell samples. Low recombination regions are shaded in grey.

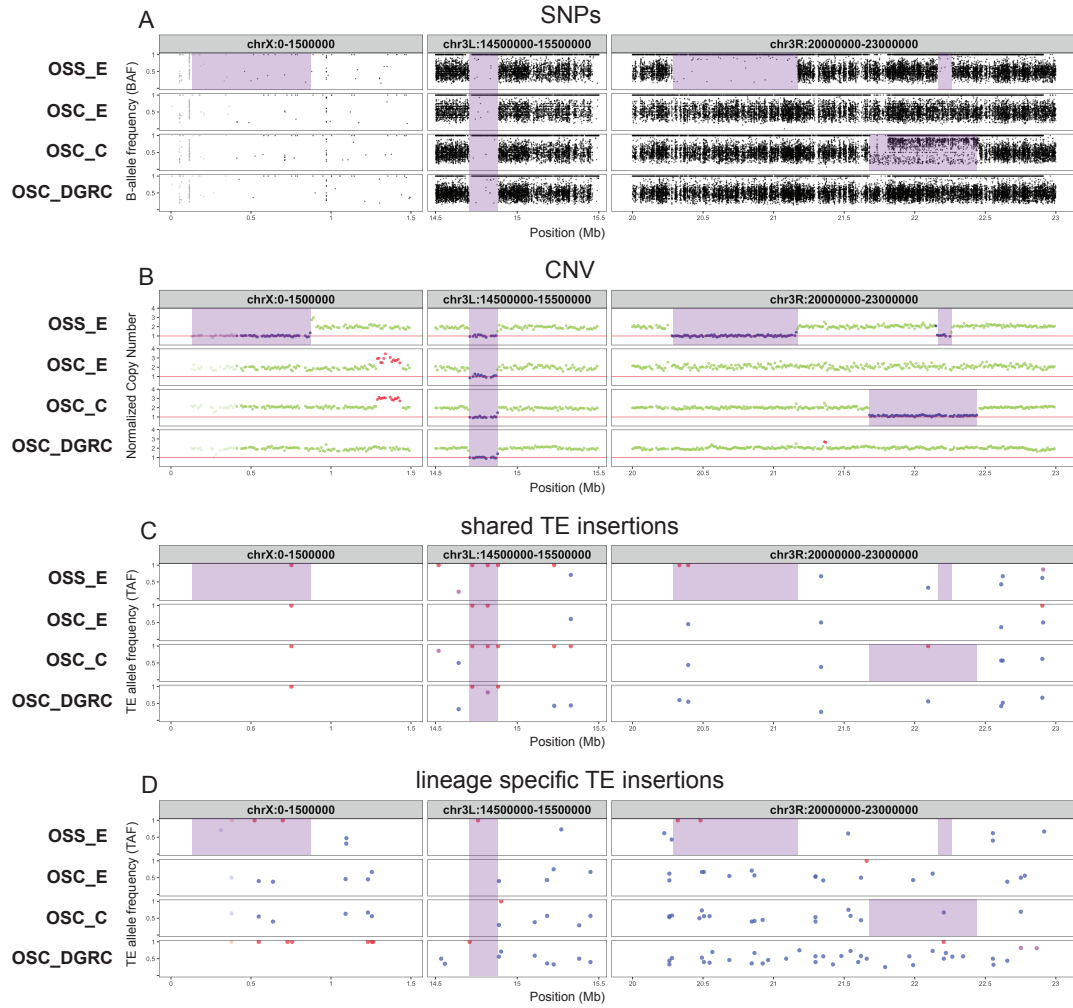

**Figure S12. Patterns of genomic variation in regions with loss of heterozygosity putatively caused by segmental deletion in *Drosophila* ovarian somatic cell lines.**

Genome-wide profiles for OSS\_E and OSC sub-lines of (A) intra-sample allele frequency based on SNP variants, (B) copy number, (C) intra-sample allele frequency based on TE insertions shared by OSS\_E and OSC sub-lines, and (D) intra-sample allele frequency based on lineage specific TE insertions restricted to only OSS\_E or the OSC sub-lines. For SNP profiles, the B-allele frequency (BAF) was determined as the coverage of reads supporting the non-reference allele divided by total coverage at that variant positions; regions of heterozygosity in a diploid genome are shown in BAF profiles where clusters of SNPs have allele frequencies centered around 0.5. For copy number profiles, each data point represents normalized copy number (ratio\*ploidy) for a given 10kb window estimated by Control-FREEC (Boeva *et al.*, 2012); data points for each window are colorized by CNV status (red: CNV gain; green: no CNV; blue: CNV loss), which are based on the comparison between normalized copy number for that window and baseline ploidy for the chromosome arm. For TE profiles, TE insertions are classified as being homozygous (red), heterozygous (blue), or undefined (purple) based on intra-sample allele frequencies estimated by ngs\_te\_mapper2. Purple shading indicates LOH regions that are putatively caused by segmental deletion.

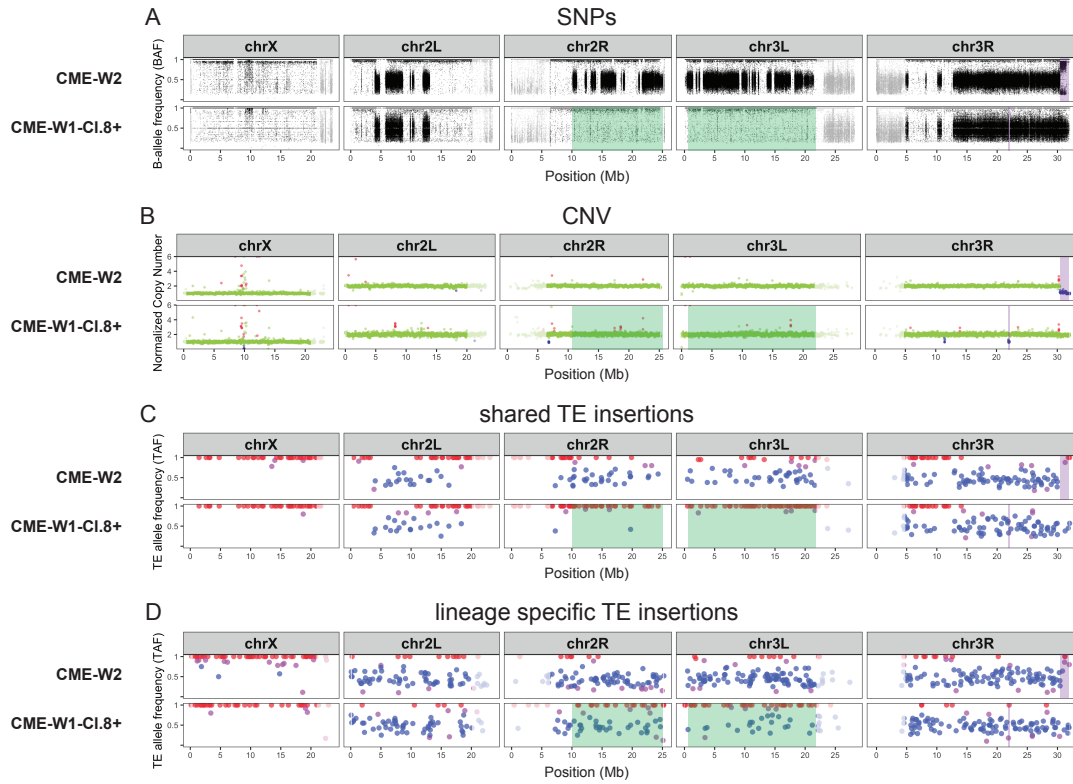

**Figure S13. Loss of heterozygosity, copy number evolution and ongoing transposition shape TE profiles in *Drosophila* imaginal disc derived cell lines.** Allele frequency profiles for CME-W2 and CME-W1-CI.8+ cell lines based on (A) SNP variants, (B) copy number, (C) intra-sample allele frequency based on TE insertions shared by CME-W2 and CME-W1-CI.8+, and (D) intra-sample allele frequency based on lineage specific TE insertions restricted to only CME-W2 or CME-W1-CI.8+. SNPs and TE insertions in highly-repetitive low recombination regions are shaded in grey. For SNP profiles, the B-allele frequency (BAF) was determined as the coverage of reads supporting the non-reference allele divided by total coverage at that variant positions; regions of heterozygosity in a diploid genome are shown in BAF profiles where clusters of SNPs have allele frequencies centered around 0.5. For copy number profiles, each data point represents normalized copy number (ratio\*ploidy) for a given 10kb window estimated by Control-FREEC (Boeva *et al.*, 2012); data points for each window are colorized by CNV status (red: CNV gain; green: no CNV; blue: CNV loss), which are based on the comparison between normalized copy number for that window and baseline ploidy for the chromosome arm. For TE profiles, TE insertions are classified as being homozygous (red), heterozygous (blue), or undefined (purple) based on intra-sample allele frequencies estimated by ngs\_te\_mapper2. Green shading indicates LOH regions that are putatively caused by mitotic recombination defined by the more extensive pattern of SNP heterozygosity in CME-W2 relative to CME-W1-CI.8+. Purple shading indicates LOH regions that are putatively caused by segmental deletion.

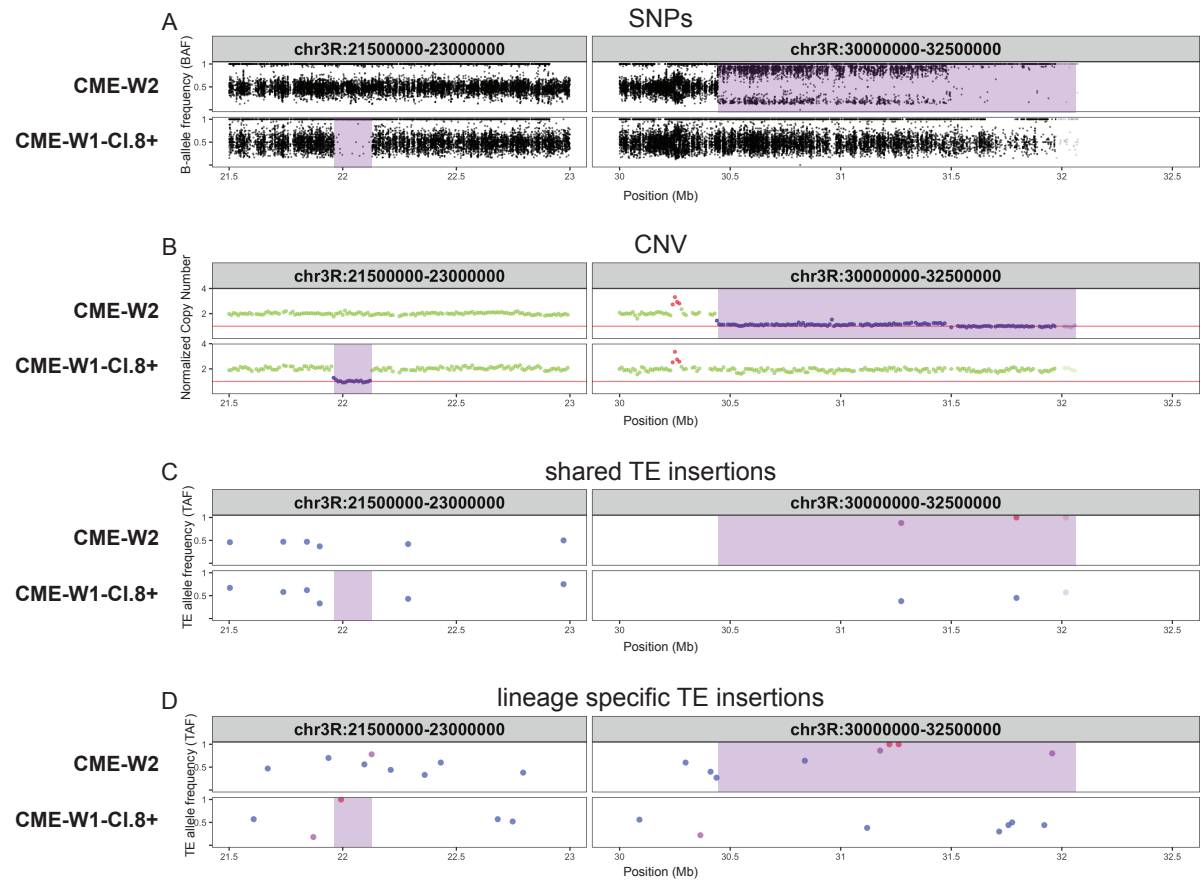

**Figure S14. Patterns of genomic variation in regions with loss of heterozygosity putatively caused by segmental deletion in *Drosophila* imaginal disc derived cell lines.**

Genome-wide profiles for CME-W2 and CME-W1-Cl.8+ of (A) intra-sample allele frequency based on SNP variants, (B) copy number, (C) intra-sample allele frequency based on TE insertions shared by CME-W2 and CME-W1-Cl.8+, and (D) intra-sample allele frequency based on lineage specific TE insertions restricted to only CME-W2 or CME-W1-Cl.8+. For SNP profiles, the B-allele frequency (BAF) was determined as the coverage of reads supporting the non-reference allele divided by total coverage at that variant positions; regions of heterozygosity in a diploid genome are shown in BAF profiles where clusters of SNPs have allele frequencies centered around 0.5. For copy number profiles, each data point represents normalized copy number (ratio\*ploidy) for a given 10kb window estimated by Control-FREEC (Boeva *et al.*, 2012); data points for each window are colorized by CNV status (red: CNV gain; green: no CNV; blue: CNV loss), which are based on the comparison between normalized copy number for that window and baseline ploidy for the chromosome arm. For TE profiles, TE insertions are classified as being homozygous (red), heterozygous (blue), or undefined (purple) based on intra-sample allele frequencies estimated by ngs.te\_mapper2. Purple shading indicates LOH regions that are putatively caused by segmental deletion.

**Table S1. Metadata and sequencing information for 34 paired-end whole genome shotgun sequencing samples from 22 *Drosophila* cell lines used in this study.** Samples indicated by an asterisk were generated in the current study, while other samples were generated by the modENCODE project (Lee *et al.*, 2014). *Drosophila* Genomics Resource Center (DGRC) cell line names and stock identifiers are given for all cell line samples except two mbn2 samples obtained from the Gorski lab (Canada's Michael Smith Genome Sciences Centre, BC Cancer) and the Strand lab (University of Georgia), respectively. For DGRC cell lines, the donor lab represents the lab who donated the stock to the DGRC. Ancestral genotypes represents the genotype of flies from which the cell lines were established. Inferred ploidy represents the ploidy estimated by analyzing DNA density of whole genome data using the method of Lee *et al.* (2014). Inferred sex represents the sex of the cell line inferred by analyzing DNA density of whole genome data and analysis of sex determination gene expression based on Lee *et al.* (2014). Coverage represents the average mapped depth of coverage after quality and adaptor trimming. N.A. indicates that this information is not available.

| Cell line         | DGRC ID  | FlyBase ID  | Donor lab                | Lab origin | Ancestral genotype                                             | Inferred ploidy | Inferred sex | SRA         | Read length | Coverage | Primary replicate |
|-------------------|----------|-------------|--------------------------|------------|----------------------------------------------------------------|-----------------|--------------|-------------|-------------|----------|-------------------|
| 1182-4H           | DGRC-177 | FBtc0000177 | Debec                    | Debec      | mh                                                             | 2               | female       | SRR497717   | 101         | 26.46    | yes               |
| CME-L1            | DGRC-156 | FBtc0000156 | Cottam & Milner          | Milner     | Oregon-R                                                       | 2               | male         | SRR497712   | 101         | 62.17    | yes               |
| CME-W1-C1.8+      | DGRC-151 | FBtc0000151 | Cottam & Milner          | Milner     | Oregon-R                                                       | 2               | male         | SRR612105   | 50          | 10.99    | no                |
| CME-W1-C1.8+      | DGRC-151 | FBtc0000151 | Cottam & Milner          | Milner     | Oregon-R                                                       | 2               | male         | SRR612106   | 50          | 10.05    | no                |
| CME-W1-C1.8+      | DGRC-151 | FBtc0000151 | Cottam & Milner          | Milner     | Oregon-R                                                       | 2               | male         | SRR497726   | 76          | 18.14    | yes               |
| CME-W2            | DGRC-155 | FBtc0000155 | Cottam & Milner          | Milner     | Oregon-R                                                       | 2               | male         | SRR497730   | 76          | 31.15    | yes               |
| Kc167             | DGRC-1   | FBtc0000001 | Cherbas                  | Echalier   | e/se                                                           | 4               | female       | SRR612107   | 50          | 15.01    | yes               |
| Kc167             | DGRC-1   | FBtc0000001 | Cherbas                  | Echalier   | e/se                                                           | 4               | female       | SRR612109   | 50          | 10.82    | no                |
| mbn2              | DGRC-147 | FBtc0000147 | Werner & Hultmark        | Gateff     | l(2)mbn                                                        | 4               | male         | SRR497728   | 76          | 18.38    | no                |
| mbn2 (*)          | DGRC-147 | FBtc0000147 | Werner & Hultmark        | Gateff     | l(2)mbn                                                        | 4               | male         | SRR13360020 | 151         | 112.69   | yes               |
| mbn2 (Gorski) (*) | N.A.     | N.A.        | Gorski                   | Gateff     | l(2)mbn                                                        | 4               | male         | SRR13360019 | 151         | 130.60   | no                |
| mbn2 (Strand) (*) | N.A.     | N.A.        | Strand                   | Gateff     | l(2)mbn                                                        | 4               | male         | SRR13360018 | 151         | 136.06   | no                |
| ML-DmBG2-c2 (*)   | DGRC-53  | FBtc0000053 | Ueda & Ui-Tei            | Miyake     | y <sup>1</sup> v <sup>1</sup> f <sup>1</sup> mal <sup>F1</sup> | 2               | male         | SRR13360022 | 151         | 127.03   | yes               |
| ML-DmBG3-c2 (*)   | DGRC-68  | FBtc0000068 | Ueda & Ui-Tei            | Miyake     | y <sup>1</sup> v <sup>1</sup> f <sup>1</sup> mal <sup>F1</sup> | 2               | male         | SRR13360021 | 151         | 130.59   | yes               |
| ML-DmD16-c3       | DGRC-97  | FBtc0000097 | Ueda & Ui-Tei            | Miyake     | y <sup>1</sup> v <sup>1</sup> f <sup>1</sup> mal <sup>F1</sup> | 4               | female       | SRR497715   | 76          | 10.73    | no                |
| ML-DmD16-c3       | DGRC-97  | FBtc0000097 | Ueda & Ui-Tei            | Miyake     | y <sup>1</sup> v <sup>1</sup> f <sup>1</sup> mal <sup>F1</sup> | 4               | female       | SRR497710   | 101         | 48.55    | yes               |
| ML-DmD17-c3       | DGRC-107 | FBtc0000107 | Ueda & Ui-Tei            | Miyake     | y <sup>1</sup> v <sup>1</sup> f <sup>1</sup> mal <sup>F1</sup> | 4               | female       | SRR497725   | 101         | 55.02    | yes               |
| ML-DmD20-c2       | DGRC-109 | FBtc0000109 | Ueda & Ui-Tei            | Miyake     | y <sup>1</sup> v <sup>1</sup> f <sup>1</sup> mal <sup>F1</sup> | 2               | male         | SRR497724   | 76          | 26.93    | yes               |
| ML-DmD20-c5       | DGRC-112 | FBtc0000112 | Ueda & Ui-Tei            | Miyake     | y <sup>1</sup> v <sup>1</sup> f <sup>1</sup> mal <sup>F1</sup> | 2               | male         | SRR497718   | 76          | 6.24     | no                |
| ML-DmD20-c5       | DGRC-112 | FBtc0000112 | Ueda & Ui-Tei            | Miyake     | y <sup>1</sup> v <sup>1</sup> f <sup>1</sup> mal <sup>F1</sup> | 2               | male         | SRR497723   | 101         | 15.42    | yes               |
| ML-DmD4-c1        | DGRC-126 | FBtc0000126 | Ueda & Ui-Tei            | Miyake     | y <sup>1</sup> v <sup>1</sup> f <sup>1</sup> mal <sup>F1</sup> | 2               | male         | SRR497716   | 76          | 34.62    | yes               |
| ML-DmD8           | DGRC-92  | FBtc0000092 | Ueda & Ui-Tei            | Miyake     | y <sup>1</sup> v <sup>1</sup> f <sup>1</sup> mal <sup>F1</sup> | 2               | female       | SRR497729   | 76          | 29.34    | yes               |
| ML-DmD9           | DGRC-85  | FBtc0000085 | Ueda & Ui-Tei            | Miyake     | y <sup>1</sup> v <sup>1</sup> f <sup>1</sup> mal <sup>F1</sup> | 4               | female       | SRR497714   | 76          | 8.89     | no                |
| ML-DmD9           | DGRC-85  | FBtc0000085 | Ueda & Ui-Tei            | Miyake     | y <sup>1</sup> v <sup>1</sup> f <sup>1</sup> mal <sup>F1</sup> | 4               | female       | SRR497711   | 101         | 40.28    | yes               |
| OSC (*)           | DGRC-288 | FBtc0000288 | Saito & Siomi            | Niki       | w1118                                                          | 2               | female       | SRR13360016 | 151         | 131.31   | yes               |
| OSS (*)           | DGRC-190 | FBtc0000190 | Niki                     | Niki       | w1118                                                          | 2               | female       | SRR13360017 | 151         | 117.27   | yes               |
| S1                | DGRC-9   | FBtc0000009 | Cherbas                  | Schneider  | Oregon-R                                                       | 2               | male         | SRR497713   | 76          | 30.39    | yes               |
| S2-DRSC           | DGRC-181 | FBtc0000181 | Perrimon & Mathey-Prevot | Schneider  | Oregon-R                                                       | 4               | male         | SRR612111   | 50          | 15.45    | no                |
| S2-DRSC           | DGRC-181 | FBtc0000181 | Perrimon & Mathey-Prevot | Schneider  | Oregon-R                                                       | 4               | male         | SRR612112   | 50          | 22.10    | yes               |
| S2R+              | DGRC-150 | FBtc0000150 | Wheeler                  | Schneider  | Oregon-R                                                       | 4               | male         | SRR497722   | 76          | 5.32     | no                |
| S2R+              | DGRC-150 | FBtc0000150 | Wheeler                  | Schneider  | Oregon-R                                                       | 4               | male         | SRR497719   | 101         | 10.66    | yes               |
| S3                | DGRC-5   | FBtc0000005 | Cherbas                  | Schneider  | Oregon-R                                                       | 4               | male         | SRR497721   | 101         | 14.99    | yes               |
| Sg4               | DGRC-179 | FBtc0000179 | Pirrota                  | Schneider  | Oregon-R                                                       | 4               | male         | SRR497720   | 101         | 26.91    | no                |
| Sg4 (*)           | DGRC-179 | FBtc0000179 | Pirrota                  | Schneider  | Oregon-R                                                       | 4               | male         | SRR13360015 | 151         | 131.41   | yes               |

**Table S2. Summary of predictions generated by eight non-reference TE insertion detection methods for 34 *Drosophila* cell line samples.** Numbers of non-reference TE insertion predictions are based on default settings for TIDAL (Rahman *et al.*, 2015; Yang *et al.*, 2021) and default McClintock (Nelson *et al.*, 2017) settings for all other methods. *INE-1* and non-reference TE insertion predictions in low recombination regions were excluded from all methods. New sequence data from this study are indicated by asterisks.

| Cell line         | SRA         | TEMP | TEMP2 | PoPoolationTE | PoPoolationTE2 | TEFLon | ngs_te_mapper | ngs_te_mapper2 | TIDAL |
|-------------------|-------------|------|-------|---------------|----------------|--------|---------------|----------------|-------|
| 1182-4H           | SRR497717   | 1084 | 1192  | 790           | 476            | 887    | 185           | 956            | 1096  |
| CME-L1            | SRR497712   | 951  | 1013  | 1118          | 600            | 957    | 237           | 909            | 1208  |
| CME-W1-C1.8+      | SRR612105   | 841  | 1370  | 40            | 152            | 100    | 0             | 1              | 1125  |
| CME-W1-C1.8+      | SRR612106   | 915  | 1418  | 37            | 192            | 68     | 0             | 0              | 1083  |
| CME-W1-C1.8+      | SRR497726   | 1398 | 1448  | 776           | 594            | 889    | 83            | 599            | 1010  |
| CME-W2            | SRR497730   | 1559 | 1578  | 1516          | 845            | 1203   | 163           | 892            | 1345  |
| Kc167             | SRR612107   | 939  | 1498  | 136           | 309            | 209    | 0             | 0              | 1323  |
| Kc167             | SRR612109   | 856  | 1432  | 91            | 266            | 88     | 0             | 0              | 1119  |
| mbn2              | SRR497728   | 1931 | 2209  | 781           | 623            | 1097   | 77            | 751            | 1318  |
| mbn2 (*)          | SRR13360020 | 1933 | 446   | 1643          | 1568           | 2415   | 365           | 2344           | 2931  |
| mbn2 (Gorski) (*) | SRR13360019 | 2194 | 639   | 1714          | 2000           | 2551   | 366           | 2551           | 3169  |
| mbn2 (Strand) (*) | SRR13360018 | 1979 | 740   | 1459          | 1581           | 2423   | 368           | 2299           | 2862  |
| ML-DmBG2-c2 (*)   | SRR13360022 | 979  | 355   | 501           | 708            | 981    | 143           | 960            | 1169  |
| ML-DmBG3-c2 (*)   | SRR13360021 | 730  | 241   | 736           | 782            | 1028   | 196           | 988            | 1350  |
| ML-DmD16-c3       | SRR497715   | 995  | 1105  | 37            | 365            | 446    | 57            | 257            | 410   |
| ML-DmD16-c3       | SRR497710   | 1077 | 1115  | 1056          | 611            | 973    | 197           | 832            | 1154  |
| ML-DmD17-c3       | SRR497725   | 1737 | 1685  | 1539          | 780            | 1501   | 196           | 1416           | 1761  |
| ML-DmD20-c2       | SRR497724   | 1293 | 1379  | 958           | 699            | 864    | 89            | 566            | 973   |
| ML-DmD20-c5       | SRR497718   | 904  | 1155  | 65            | 195            | 306    | 30            | 141            | 225   |
| ML-DmD20-c5       | SRR497723   | 924  | 1282  | 520           | 374            | 729    | 114           | 720            | 797   |
| ML-DmD4-c1        | SRR497716   | 897  | 994   | 866           | 588            | 764    | 92            | 545            | 863   |
| ML-DmD8           | SRR497729   | 928  | 1057  | 783           | 596            | 685    | 80            | 476            | 805   |
| ML-DmD9           | SRR497714   | 1160 | 1376  | 126           | 283            | 416    | 34            | 252            | 354   |
| ML-DmD9           | SRR497711   | 1346 | 1468  | 1240          | 564            | 1133   | 184           | 1143           | 1444  |
| OSC (*)           | SRR13360016 | 1357 | 607   | 596           | 964            | 1312   | 327           | 1370           | 1764  |
| OSS (*)           | SRR13360017 | 2579 | 580   | 1188          | 1640           | 2285   | 308           | 2506           | 2868  |
| S1                | SRR497713   | 1569 | 1627  | 1057          | 763            | 1169   | 165           | 835            | 1290  |
| S2-DRSC           | SRR612111   | 1608 | 2368  | 263           | 447            | 451    | 0             | 0              | 1874  |
| S2-DRSC           | SRR612112   | 2174 | 2575  | 534           | 609            | 604    | 0             | 0              | 1888  |
| S2R+              | SRR497722   | 1480 | 1954  | 78            | 219            | 357    | 26            | 225            | 313   |
| S2R+              | SRR497719   | 1554 | 2362  | 429           | 353            | 969    | 145           | 1179           | 1114  |
| S3                | SRR497721   | 1486 | 2036  | 895           | 509            | 1147   | 359           | 1338           | 1482  |
| Sg4               | SRR497720   | 2022 | 2418  | 1692          | 823            | 1719   | 497           | 1864           | 2165  |
| Sg4 (*)           | SRR13360015 | 1883 | 881   | 1275          | 1579           | 2421   | 774           | 2519           | 2844  |

**Table S3. Summary of transcriptome data for *Drosophila* cell lines analyzed in this study.**

Samples are from two consistent batches of RNA-seq experiments performed on DGRC cell lines with genome data. The first batch is poly-A RNA-seq samples from Stoiber *et al.* (2016) (PRJNA306537) and the other batch is total RNA-seq samples from Brown *et al.* (2014) (PRJNA75285). All samples have 100 bp paired end reads.

| Cell_line    | SRA        | Study_accession | Gigabases |
|--------------|------------|-----------------|-----------|
| 1182-4H      | SRR1197409 | PRJNA75285      | 10.0      |
| 1182-4H      | SRR3038250 | PRJNA306537     | 3.7       |
| CME-L1       | SRR1197410 | PRJNA75285      | 10.8      |
| CME-L1       | SRR3038125 | PRJNA306537     | 4.4       |
| CME-W1-CI.8+ | SRR3038123 | PRJNA306537     | 3.1       |
| CME-W2       | SRR1197407 | PRJNA75285      | 10.9      |
| CME-W2       | SRR3038127 | PRJNA306537     | 2.6       |
| Kc167        | SRR1197456 | PRJNA75285      | 11.6      |
| Kc167        | SRR3040509 | PRJNA306537     | 3.4       |
| mbn2         | SRR1197406 | PRJNA75285      | 9.3       |
| mbn2         | SRR3040560 | PRJNA306537     | 2.7       |
| ML-DmD16-c3  | SRR1197401 | PRJNA75285      | 10.1      |
| ML-DmD17-c3  | SRR3041988 | PRJNA306537     | 1.8       |
| ML-DmD20-c5  | SRR1197396 | PRJNA75285      | 10.4      |
| ML-DmD20-c5  | SRR3042157 | PRJNA306537     | 2.8       |
| ML-DmD4-c1   | SRR1197397 | PRJNA75285      | 10.3      |
| ML-DmD4-c1   | SRR3042204 | PRJNA306537     | 2.7       |
| ML-DmD8      | SRR1197284 | PRJNA75285      | 8.0       |
| ML-DmD8      | SRR3042539 | PRJNA306537     | 4.3       |
| ML-DmD9      | SRR1197283 | PRJNA75285      | 10.3      |
| ML-DmD9      | SRR3042543 | PRJNA306537     | 3.4       |
| S1           | SRR1197281 | PRJNA75285      | 8.8       |
| S1           | SRR3042563 | PRJNA306537     | 3.4       |
| S2-DRSC      | SRR1197282 | PRJNA75285      | 9.6       |
| S2-DRSC      | SRR3042565 | PRJNA306537     | 3.1       |
| S2R+         | SRR1197280 | PRJNA75285      | 9.0       |
| S3           | SRR1197277 | PRJNA75285      | 8.9       |
| S3           | SRR3042571 | PRJNA306537     | 3.8       |
| Sg4          | SRR1197278 | PRJNA75285      | 8.8       |
| Sg4          | SRR3042573 | PRJNA306537     | 4.9       |



**Table S4. ngs\_te\_mapper2 performance benchmark using single insertion synthetic data.**

ngs\_te\_mapper (Linhaire and Bergman, 2012) and ngs\_te\_mapper2 were benchmarked by creating single synthetic TE insertions in the ISO1 (dm6) genome assembly, simulating reads from these modified assemblies under different coverages, then generating insertion predictions using unmodified assembly as reference genome and comparing predictions with expected insertion annotations. 10 single synthetic insertion simulation experiments were performed for each of the 125 TE families in *D. melanogaster* (excluding *INE-1*), making up 1250 total simulations each with one synthetic insertion. “Total” represents the total number of predictions from all 1250 experiments after filtering (see filtering criteria in section 1.2). “True Positives” and “False Positives” represent the number of predictions that match or don’t match expected insertion annotations, respectively (see matching criteria in section 1.2). “False Negatives” represent the number of expected insertion annotations that are not predicted by the TE detection method. “Precision” represents the number of true positives divided by total number of predictions. “Recall” represents the number of true positives divided by total number of expected insertions (1250).

| Method         | Coverage | Total | True Positives | False Positives | False Negatives | Precision | Recall |
|----------------|----------|-------|----------------|-----------------|-----------------|-----------|--------|
| ngs_te_mapper  | 14       | 487   | 481            | 6               | 769             | 98.8%     | 38.5%  |
| ngs_te_mapper  | 25       | 525   | 519            | 6               | 731             | 98.9%     | 41.5%  |
| ngs_te_mapper  | 50       | 534   | 527            | 7               | 723             | 98.7%     | 42.2%  |
| ngs_te_mapper  | 100      | 533   | 524            | 9               | 726             | 98.3%     | 41.9%  |
| ngs_te_mapper2 | 14       | 1149  | 1146           | 3               | 104             | 99.7%     | 91.7%  |
| ngs_te_mapper2 | 25       | 1181  | 1173           | 8               | 77              | 99.3%     | 93.8%  |
| ngs_te_mapper2 | 50       | 1189  | 1174           | 15              | 76              | 98.7%     | 93.9%  |
| ngs_te_mapper2 | 100      | 1211  | 1175           | 36              | 75              | 97.0%     | 94.0%  |

**Table S5. ngs\_te\_mapper2 performance benchmark using genome-wide synthetic data from ISO1 and A4 genome assemblies.** Non-reference TE insertion predictions made by ngs\_te\_mapper2 using the A4 genome assembly as reference were evaluated against curated TE annotations in ISO1 lifted over to A4 coordinates (see section 1.2 for details). Zygosity represents whether simulated reads were generated from both ISO1 and A4 (heterozygous) or ISO1 only (homozygous). “True Positives” and “False Positives” represent the number of predictions that match and doesn’t match with lifted over insertion annotations, respectively. “False Negatives” represent the number of lifted over non-reference TE insertion annotations that are not predicted by ngs\_te\_mapper2. “Precision” represents the number of true positives divided by total number of predictions. “Recall” represents the number of true positives divided by total number of lifted over non-reference TE insertion annotations.

| Zygosity     | Coverage | Total | True positives | False positives | False negatives | Precision | Recall |
|--------------|----------|-------|----------------|-----------------|-----------------|-----------|--------|
| heterozygous | 14       | 346   | 336            | 10              | 285             | 97.1%     | 53.8%  |
| heterozygous | 25       | 424   | 412            | 12              | 209             | 97.2%     | 66.0%  |
| heterozygous | 50       | 476   | 462            | 14              | 159             | 97.1%     | 74.0%  |
| heterozygous | 100      | 482   | 464            | 18              | 157             | 96.3%     | 74.4%  |
| homozygous   | 14       | 437   | 424            | 13              | 197             | 97.0%     | 67.9%  |
| homozygous   | 25       | 473   | 461            | 12              | 160             | 97.5%     | 73.9%  |
| homozygous   | 50       | 482   | 465            | 17              | 156             | 96.5%     | 74.5%  |
| homozygous   | 100      | 516   | 490            | 26              | 131             | 95.0%     | 78.5%  |

**Table S6. Performance benchmark for intra-sample TE insertion zygosity classifier.**

ngs\_te\_mapper2 predictions on synthetic data from ISO1 and A4 genome assemblies were used as input for the classifier. Zygosity represents whether the simulated reads were generated from both ISO1 and A4 (heterozygous) or ISO1 only (homozygous). Precision represents the proportion of predictions being correctly classified as heterozygous or homozygous by the classifier.

| Zygosity     | Coverage | Total | Homozygous count | Heterozygous count | Unclassified count | Precision |
|--------------|----------|-------|------------------|--------------------|--------------------|-----------|
| heterozygous | 14       | 346   | 0                | 326                | 20                 | 94.2%     |
| heterozygous | 25       | 424   | 0                | 419                | 5                  | 98.8%     |
| heterozygous | 50       | 476   | 0                | 473                | 3                  | 99.4%     |
| heterozygous | 100      | 482   | 0                | 477                | 5                  | 99.0%     |
| homozygous   | 14       | 437   | 399              | 4                  | 34                 | 91.3%     |
| homozygous   | 25       | 473   | 438              | 3                  | 32                 | 92.6%     |
| homozygous   | 50       | 482   | 456              | 3                  | 23                 | 94.6%     |
| homozygous   | 100      | 516   | 489              | 9                  | 18                 | 94.8%     |

## 133 Supplemental References

- 134 Bergman, C. M., 2012 A proposal for the reference-based annotation of de novo transposable element insertions.  
135 Mob Genet Elements **2**: 51–54.
- 136 Boeva, V., T. Popova, K. Bleakley, P. Chiche, J. Cappo, *et al.*, 2012 Control-FREEC: a tool for assessing copy  
137 number and allelic content using next-generation sequencing data. Bioinformatics **28**: 423–425.
- 138 Brown, J. B., N. Boley, R. Eisman, G. E. May, M. H. Stoiber, *et al.*, 2014 Diversity and dynamics of the Drosophila  
139 transcriptome. Nature **512**: 393–399.
- 140 Chakraborty, M., N. W. VanKuren, R. Zhao, X. Zhang, S. Kalsow, *et al.*, 2018 Hidden genetic variation shapes the  
141 structure of functional elements in Drosophila. Nat Genet **50**: 20–25.
- 142 Lee, H., C. J. McManus, D.-Y. Cho, M. Eaton, F. Renda, *et al.*, 2014 DNA copy number evolution in Drosophila  
143 cell lines. Genome Biol **15**: R70.
- 144 Li, H., 2015 wgsim.
- 145 Li, H., B. Handsaker, A. Wysoker, T. Fennell, J. Ruan, *et al.*, 2009 The Sequence Alignment/Map format and  
146 SAMtools. Bioinformatics **25**: 2078–2079.
- 147 Linheiro, R. S. and C. M. Bergman, 2012 Whole genome resequencing reveals natural target site preferences of  
148 transposable elements in Drosophila melanogaster. PLOS One **7**: e30008.
- 149 Nelson, M. G., R. S. Linheiro, and C. M. Bergman, 2017 McClintock: an integrated pipeline for detecting trans-  
150 posable element insertions in whole-genome shotgun sequencing data. G3 **7**: 2749–2762.
- 151 Rahman, R., G.-w. Chirn, A. Kanodia, Y. A. Sytnikova, B. Brembs, *et al.*, 2015 Unique transposon landscapes are  
152 pervasive across Drosophila melanogaster genomes. Nucleic Acids Res **43**: 10655–10672.
- 153 Stoiber, M., S. Celniker, L. Cherbas, B. Brown, and P. Cherbas, 2016 Diverse Hormone Response Networks in 41  
154 Independent Drosophila Cell Lines. G3 **6**: 683–694.
- 155 Yang, N., S. P. Srivastav, R. Rahman, Q. Ma, G. Dayama, *et al.*, 2021 Transposable element landscape changes are  
156 buffered by RNA silencing in aging Drosophila. bioRxiv .
